# Supplementary material for: Detection and monitoring of insect traces in bioaerosols
Source: PeerJ journal article supplement (doi:10.7717/peerj.10862), 2021-02-09

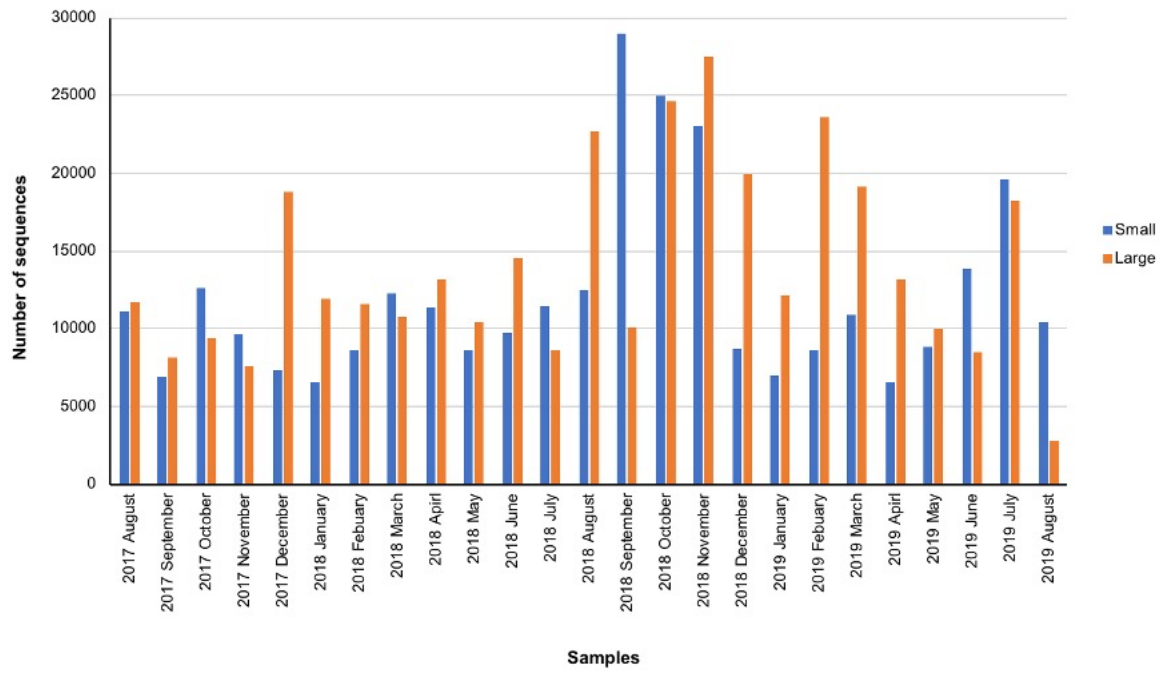

Supplement: Figure.S1.pdf [file Figure.S1.pdf]
